# Supplementary material for: Elevated expression of Par3 promotes prostate cancer metastasis by forming a Par3/aPKC/KIBRA complex and inactivating the hippo pathway
Source: PubMed Central journal article supplement (PMC5633884; doi:10.1186/s13046-017-0609-y), 2017-10-10
Supplement: 13046_2017_609_MOESM3_ESM.pdf [file 13046_2017_609_MOESM3_ESM.pdf]

Additional file 3:

**Table S1:** Clinical data from 14 patients and 7 normal persons for qRT-PCR and western blot assay in the study.

|     | Age | Gleason Scores | TNM stage | Metastasis |
|-----|-----|----------------|-----------|------------|
| N1  | 72  | —              | —         | —          |
| N2  | 59  | —              | —         | —          |
| N3  | 62  | —              | —         | —          |
| N4  | 61  | —              | —         | —          |
| N5  | 68  | —              | —         | —          |
| N6  | 70  | —              | —         | —          |
| N7  | 60  | —              | —         | —          |
| P1  | 74  | 6              | T2bN0M0   | No         |
| P2  | 57  | 7              | T2bN0M0   | No         |
| P3  | 66  | 7              | T2cN0M0   | No         |
| P4  | 72  | 7              | T2cN0M0   | No         |
| P5  | 60  | 7              | T2aN0M0   | No         |
| P6  | 73  | 7              | T2aN0M0   | No         |
| P7  | 59  | 7              | T3bN0M1   | Yes        |
| P8  | 62  | 7              | T3bN0M1   | Yes        |
| P9  | 59  | 8              | T2cN0M1   | Yes        |
| P10 | 77  | 8              | T4N2M1b   | Yes        |
| P11 | 72  | 8              | T3bN1M1   | Yes        |
| P12 | 75  | 8              | T4N1M1    | Yes        |
| P13 | 80  | 9              | T4N1M1    | Yes        |
| P14 | 79  | 10             | T4N1M1    | Yes        |

N: normal control; P: patient; —: Data not detected.

**Table S2:** Clinical data from 2 patients and 1 normal person for IHC staining in the study.

|                                    | Age | Gleason Scores | TNM stage | Metastasis |
|------------------------------------|-----|----------------|-----------|------------|
| Normal control                     | 71  | —              | —         | —          |
| Prostate cancer without metastasis | 73  | 8              | T2cN1M0   | No         |
| Prostate cancer with metastasis    | 69  | 9              | T4N1M1    | Yes        |

—: Data not detected.
