# Supplementary material for: Elevated expression of Par3 promotes prostate cancer metastasis by forming a Par3/aPKC/KIBRA complex and inactivating the hippo pathway
Source: Springer Nature journal article supplement (doi:10.1186/s13046-017-0609-y), 2017-10-10
Supplement: MOESM1 [file 15124198]

Additional file 1:

**Table S1:** qRT-PCR primers for this study.

| Name       | Sequence (5' - 3')     |
|------------|------------------------|
| Par3 (F)   | TATAATGCGAGGGTCTGGACGG |
| Par3 (R)   | CGTCTAAGCAGCTGCAAGGAG  |
| MMP1 (F)   | GGTTGCGCTTTCCTTTCTGT   |
| MMP1 (R)   | CTTTCTCCGCAGTTTCCTCA   |
| MMP9 (F)   | GGGCAATCAATGGATGAAAG   |
| MMP9 (R)   | AGTAATTCTTCACCCTGCAG   |
| Snail1 (F) | TATAATGCGAGGGTCTGGACGG |
| Snail1 (R) | CGTCTAAGCAGCTGCAAGGAG  |
| Twist1 (F) | TAAACTGGGGTCGCATTGTG   |
| Twist1 (R) | GGTGGTCATTCAGGTAAGTG   |
| Zeb1 (F)   | GGTTGCGCTTTCCTTTCTGT   |
| Zeb1 (R)   | CTTTCTCCGCAGTTTCCTCA   |

F: forward primer, R: reverse primer

**Table S2:** Antibodies for this study.

| Name                | Company                   | Lot No.   |
|---------------------|---------------------------|-----------|
| Par3                | Millipore                 | 07-330    |
| aPKC                | Santa cruz                | sc-216    |
| KIBRA               | Cell Signaling Technology | #8774     |
| Merlin              | Cell Signaling Technology | 12888     |
| FRMD6               | Santa cruz                | sc-138008 |
| Lats1               | Cell Signaling Technology | #3477     |
| Lats2               | Cell Signaling Technology | #5888     |
| p-Lats              | Cell Signaling Technology | #8654     |
| YAP                 | Cell Signaling Technology | #4912     |
| p-YAP               | Cell Signaling Technology | #4911     |
| MMP1                | Santa cruz                | sc-21731  |
| MMP9                | Santa cruz                | sc-6840   |
| Zeb1                | Santa cruz                | sc-10572  |
| Snail1              | Cell Signaling Technology | #3879     |
| Twist1              | Santa cruz                | sc-15393  |
| ATP1A1 <sup>a</sup> | Santa cruz                | sc-16041  |
| TBP <sup>b</sup>    | Proteintech               | 66166-1g  |
| GAPDH               | Cell Signaling Technology | #8884     |

a: ATP1A1: ATPase Na<sup>+</sup>/K<sup>+</sup> transporting subunit alpha 1, an internal control for membranous protein

b: TBP, TATA-box binding protein, an internal control for nuclear protein

**Table S3:** qPCR primers of ChIP assay for this study.

| Name   | Sequence (5' - 3')                                                   |
|--------|----------------------------------------------------------------------|
| MMP1   | Site 1<br>GCTTTGAGGCCTTTCACAGA (F)<br>CCTTTACCCCTTATGACAAG (R)       |
|        | Site 2<br>TGAGCATTTAGCATGAGAGC (F)<br>GAAATAGAGCCTTGGAGTCC (R)       |
|        | Site 3<br>ACAGGCCAGTGTTTCTCCA (F)<br>GGTGTCAACCAGTGCTATCT (R)        |
|        | Site 4<br>TAGACCAAGGAGCGAAGAT (F)<br>CCTTCCCTGAAACTTGTCTG (R)        |
|        | Site 5<br>AGTTGGAGGTGAGAGTGAAC (F)<br>TCGCAGTTGCTTTTATCCTT (R)       |
|        | Contrl site<br>AACAAAGGCAGAAGGGAACC (F)<br>GGAATTACTAACACTGCGCAC (R) |
| MMP9   | Site 1<br>ACCCAGATGAAGATCCTCCA (F)<br>GCATTTAGGGAATCAGAGGC (R)       |
|        | Site 2<br>GCCTCCCAAAGTGCTAAGAT (F)<br>CTGTAGGTTGTAAGTCCGCA (R)       |
|        | Site 3<br>TTCTAGAGGCTGCTACTGTC (F)<br>GCCTTCTTTGACTCAGCTTC (R)       |
|        | Contrl site<br>CCTTTCTCATGCTGGTGCTG (F)<br>CTGACTGCAGCTGCTGTTGT (R)  |
| Zeb1   | Site 1<br>GTGGGTATTACTCATTCCGC (F)<br>GGGATGGGAAGTGACTTCAA (R)       |
|        | Contrl site<br>AAGGGAGGAAGAAGTACACAC (F)<br>CAGTCCTCGCTTTCCTTGAT (R) |
| Snail1 | Site 1<br>GGCACCAAGTGACTAAACAG (F)<br>TCACAGGTCTCACCGTTCTT (R)       |
|        | Site 2<br>TGAGGCAAAGTCCAAACTCC (F)<br>GGCAACTGCTTCAGAGTAAC (R)       |
|        | Contrl site<br>TACAGGATTGCACCAGGGTT (F)<br>AACTGTTGTCCAGCCCAAAC (R)  |
| Twist1 | Site 1<br>GAGCCATCCTTGCAAATGTG (F)<br>ACTCCCTGCTTTGCAAAGT (R)        |
|        | Site 2<br>TGGCCACAAAGGAAAGAGTC (F)<br>GCTGCAGAAATCTCGAAACC (R)       |
|        | Site 3<br>GGATGGACCTGAAACGGTTA (F)<br>AGCAGCAAAGTTGGTGAACC (R)       |
|        | Site 4<br>GTTCGTCTACCTGACCATTG (F)<br>CCGATTTGGGATTGCTGG (R)         |
|        | Contrl site<br>GGACAAGCTGAGCAAGATTC (F)<br>ACATAGCTGCAGCTTGCCAT (R)  |

F: forward primer, R: reverse primer
