# Supplementary material for: Elevated expression of Par3 promotes prostate cancer metastasis by forming a Par3/aPKC/KIBRA complex and inactivating the hippo pathway
Source: J Exp Clin Cancer Res. 2017 Oct 10;36:139. doi: 10.1186/s13046-017-0609-y (PMC5633884; doi:10.1186/s13046-017-0609-y)
Supplement: Supplementary file 4 — Clinical data of 35 PCa patient samples from a tissue chip. (PDF 52 kb) [file 13046_2017_609_MOESM4_ESM.pdf]

Additional file 4:

**Table S1:** Clinical data of 35 PCa patient samples from a tissue chip.

|                  | Tissue ID | Age | Gleason Score |
|------------------|-----------|-----|---------------|
| P1               | I05A1029  | 73  | 6             |
| P2               | I05A0919  | 74  | 6             |
| P3               | I05A1035  | 77  | 6             |
| P4               | I05A0925  | 75  | 6             |
| P5               | I05A1041  | 63  | 6             |
| P6               | I05A0928  | 72  | 6             |
| P7               | I05A0977  | 59  | 6             |
| P8               | I05A0990  | 67  | 6             |
| P9               | I05A1005  | 59  | 6             |
| P10              | I05A1017  | 64  | 6             |
| P11              | I05A1019  | 74  | 6             |
| P12              | I05A1023  | 67  | 6             |
| P13 <sup>#</sup> | I05A0917  | 77  | 7             |
| P14              | I05A1033  | 67  | 7             |
| P15              | I05A0961  | 73  | 7             |
| P16              | I05A0962  | 53  | 7             |
| P17              | I05A0964  | 66  | 7             |
| P18              | I05A0973  | 57  | 7             |
| P19              | I05A0980  | 70  | 7             |
| P20              | I05A0984  | 74  | 7             |
| P21              | I05A0987  | 73  | 7             |
| P22              | I05A1001  | 62  | 7             |
| P23              | I05A0981  | 52  | 7             |
| P24              | I05A1007  | 71  | 7             |
| P25              | I05A1008  | 58  | 7             |
| P26              | I05A1012  | 66  | 7             |
| P27              | I05A1014  | 69  | 7             |
| P28              | I05A1016  | 62  | 7             |
| P29              | I05A0965  | 65  | 8             |
| P30 <sup>#</sup> | I05A0978  | 70  | 8             |
| P31              | I05A0979  | 65  | 8             |
| P32              | I05A0993  | 74  | 8             |
| P33              | I05A1027  | 84  | 8             |
| P34 <sup>#</sup> | I05A1044  | 67  | 9             |
| P35              | I05A0976  | 69  | 9             |

The chip was purchased from Shanghai Outdo Biotech Company (<http://www.outdobitech.com>) with chip ID HProA100PG01.

<sup>#</sup>A representative image shown in Figure S6b was observed by IF staining using tissues from patients labeled in #.
